# Supplementary material for: The Involvement of RhoA and Wnt-5a in the Tumorigenesis and Progression of Ovarian Epithelial Carcinoma
Source: PubMed Central journal article supplement (PMC3876104; doi:10.3390/ijms141224187), 2013-12-12
Supplement: ijms-14-24187-s001.pdf [file ijms-14-24187-s001.pdf]

## Supplementary Information

**Table S1.** Correlation of *RhoA* and *Wnt-5a* mRNA expression with tumorigenesis and aggressiveness of ovarian carcinoma.

| Clinicopathological features       | <i>n</i> | <i>RhoA</i> mRNA expression/GAPDH | <i>Wnt-5a</i> mRNA expression/GAPDH |
|------------------------------------|----------|-----------------------------------|-------------------------------------|
| <b>Pathological classification</b> |          |                                   |                                     |
| Serous adenocarcinoma              | 46       | 0.003032 ± 0.003243               | 0.000747 ± 0.000736                 |
| Miscellaneous subtypes             | 14       | 0.002432 ± 0.003582               | 0.001261 ± 0.001421                 |
| <b>FIGO staging</b>                |          |                                   |                                     |
| I–II                               | 31       | 0.002067 ± 0.002787               | 0.000749 ± 0.000856                 |
| III–IV                             | 29       | 0.003773 ± 0.003621 *             | 0.001144 ± 0.000985 *               |
| <b>Differentiation</b>             |          |                                   |                                     |
| Well                               | 15       | 0.001717 ± 0.003162               | 0.000516 ± 0.000575                 |
| Moderate                           | 28       | 0.002559 ± 0.002976               | 0.000733 ± 0.000874                 |
| Poor                               | 17       | 0.004476 ± 0.003522 **            | 0.001396 ± 0.001147 **              |

\* Compared with International Federation of Gynecology and Obstetrics (FIGO) stage I/II ( $p = 0.0445$ ;  $p = 0.0279$ ); \*\* Compared with moderately differentiated and well differentiated ( $p = 0.0182$ ;  $p = 0.0057$ ).

**Table S2.** Correlation of *RhoA* and *Wnt-5a* protein expression with tumorigenesis and aggressiveness of ovarian carcinoma.

| Clinicopathological features       | <i>n</i> | <i>RhoA</i> protein expression/GAPDH | <i>Wnt-5a</i> protein expression/GAPGH |
|------------------------------------|----------|--------------------------------------|----------------------------------------|
| <b>Pathological classification</b> |          |                                      |                                        |
| Serous adenocarcinoma              | 56       | 1.684880 ± 1.400929                  | 0.563563 ± 0.489970                    |
| Miscellaneous subtypes             | 16       | 1.285997 ± 0.589267                  | 0.452062 ± 0.181456                    |
| <b>FIGO staging</b>                |          |                                      |                                        |
| I–II                               | 32       | 1.251530 ± 0.698392                  | 0.421421 ± 0.252762                    |
| III–IV                             | 40       | 1.872007 ± 1.545606 *                | 0.632676 ± 0.532978 *                  |
| <b>Differentiation</b>             |          |                                      |                                        |
| Well                               | 20       | 1.259664 ± 0.617077                  | 0.452474 ± 0.202293                    |
| Moderate                           | 31       | 1.396119 ± 0.785278                  | 0.441835 ± 0.268450                    |
| Poor                               | 21       | 2.212203 ± 1.973854 **               | 0.764103 ± 0.685803 **                 |

\* Compared with International Federation of Gynecology and Obstetrics (FIGO) stage I/II ( $p = 0.0390$ ;  $p = 0.0429$ ); \*\* Compared with moderately differentiated and well differentiated ( $p = 0.007514$ ;  $p = 0.004691$ ).

**Table S3.** RT-PCR primers.

| <i>Gene</i>   | Primer sequence               | Target sequence | AT (°C) | Product size (bp) | Extension time (s) |
|---------------|-------------------------------|-----------------|---------|-------------------|--------------------|
| <i>RhoA</i>   | F: 5'-ACTCGGATTCGTTGCC-3'     | NM-001664       | 60      | 276               | 34                 |
|               | R: 5'-TTGGGACAGAAATGCTTGA-3'  | 585-860         |         |                   |                    |
| <i>Wnt-5a</i> | F: 5'-GCGAAGACAGGCATCAAA-3'   | NM-003392       | 60      | 295               | 34                 |
|               | R: 5'-CCTTGGCAAAGCGGTAG-3'    | 946-1240        |         |                   |                    |
| <i>P70S6k</i> | F: 5'-TAAAGCATCCCTTCATCG-3'   | NM_003161       | 60      | 139               | 34                 |
|               | R: 5'-CAGGCAGTGTCTCCATAA-3'   | 552-690         |         |                   |                    |
| <i>PI3K</i>   | F: 5'-CACCGCATTGTGTCGT-3'     | NM_001242466    | 60      | 225               | 34                 |
|               | R: 5'-CTCCACTTCTACGC-3'       | 4016-4240       |         |                   |                    |
| <i>Akt</i>    | F: 5'-GGGACAGAGGAGCAAGGT-3'   | NM_005163       | 60      | 208               | 34                 |
|               | R: 5'-CGACAGCGGAAAGGTAA-3'    | 2656-2863       |         |                   |                    |
| <i>Bcl/xL</i> | F: 5'-TTCCCAGAAAGGATACAGC-3'  | Z23115          | 60      | 92                | 34                 |
|               | R: 5'-GGGTCTCCATCTCCGATT-3'   | 185-276         |         |                   |                    |
| Survivin      | F: 5'-CTTGGCCCAGTGTTTCTT-3'   | DQ227257        | 60      | 124               | 34                 |
|               | R: 5'-GCTTCCAGTCCCTCCCT-3'    | 159-282         |         |                   |                    |
| <i>VEGF</i>   | F: 5'-AGGAGGAGGGCAGAATC-3'    | NM_001171630    | 60      | 258               | 34                 |
|               | R: 5'-ATGTGCTGGCCTTGGT-3'     | 1131-1388       |         |                   |                    |
| <i>GAPDH</i>  | F: 5'-CAATGACCCCTTCATTGACC-3' | NM_002046.3     | 60      | 135               | 34                 |
|               | R: 5'-TGGAAGATGGTGATGGGATT-3' | 201-335         |         |                   |                    |

AT = annealing temperature.

© 2013 by the authors; licensee MDPI, Basel, Switzerland. This article is an open access article distributed under the terms and conditions of the Creative Commons Attribution license (<http://creativecommons.org/licenses/by/3.0/>).
